# Supplementary material for: Systemically Circulating Viral and Tumor-Derived MicroRNAs in KSHV-Associated Malignancies
Source: PubMed Central journal article supplement (PMC3715412; doi:10.1371/journal.ppat.1003484), 2013-07-18
Supplement: ppat.1003484.s020.pdf [file ppat.1003484.s020.pdf]

**Table S3**

| <b>TaqMan® MicroRNA Assays<br/>Human Panel - Early Access Kit</b> |                                             | <b>Species Targeted by Assay<br/>(Sanger miRNA Registry 9/04, Version 5.0)</b> |              |            |
|-------------------------------------------------------------------|---------------------------------------------|--------------------------------------------------------------------------------|--------------|------------|
| <b>AB Assay Name</b>                                              | <b>Mature miRNA Sequence (Assay Target)</b> | <b>Human</b>                                                                   | <b>Mouse</b> | <b>Rat</b> |
| hsa-let-7a                                                        | ugagguaguagguuguauaguu                      | Yes                                                                            | Yes          | Yes        |
| hsa-let-7b                                                        | ugagguaguagguugugugguu                      | Yes                                                                            | Yes          | Yes        |
| hsa-let-7d                                                        | agagguaguagguugcuaugu                       | Yes                                                                            | Yes          | Yes        |
| hsa-let-7e                                                        | ugagguaggagguuguauagu                       | Yes                                                                            | Yes          | Yes        |
| hsa-let-7g                                                        | ugagguaguaguuuuguacagu                      | Yes                                                                            | Yes          |            |
| hsa-let-7i                                                        | ugagguaguaguuuugugcu                        | Yes                                                                            | Yes          | Yes        |
| hsa-miR-9                                                         | ucuuugguuauacuagcugauga                     | Yes                                                                            | Yes          | Yes        |
| hsa-miR-9*                                                        | uaaagcuagauaacccgaaagu                      | Yes                                                                            | Yes          |            |
| hsa-miR-10a                                                       | uaccuguagauccgaaauuugug                     | Yes                                                                            | Yes          | Yes        |
| hsa-miR-15a                                                       | uagcagcacauaaugguuugug                      | Yes                                                                            | Yes          |            |
| hsa-miR-15b                                                       | uagcagcacaucaugguuuaca                      | Yes                                                                            | Yes          | Yes        |
| hsa-miR-16                                                        | uagcagcacguaaaauauuggcg                     | Yes                                                                            | Yes          | Yes        |
| hsa-miR-17-3p                                                     | acugcagugaaggcacuugu                        | Yes                                                                            |              |            |
| hsa-miR-17-5p                                                     | caaagugcuuacagugcagguagu                    | Yes                                                                            | Yes          | Yes        |
| hsa-miR-19a                                                       | ugugcaaaucuaugcaaacuga                      | Yes                                                                            | Yes          | Yes        |
| hsa-miR-20                                                        | uaaagugcuuauagugcaggua                      | Yes                                                                            |              |            |
| hsa-miR-21                                                        | uagcuuacagacugauguuga                       | Yes                                                                            | Yes          | Yes        |
| hsa-miR-23a                                                       | aucacauugccagggauuucc                       | Yes                                                                            | Yes          | Yes        |
| hsa-miR-23b                                                       | aucacauugccagggauuaccac                     | Yes                                                                            | Yes          | Yes        |
| hsa-miR-25                                                        | cauugcacuugucucggucuga                      | Yes                                                                            | Yes          | Yes        |
| hsa-miR-26a                                                       | uucaaguaauccaggauaggcu                      | Yes                                                                            | Yes          | Yes        |
| hsa-miR-26b                                                       | uucaaguaauucaggauaggu                       | Yes                                                                            |              |            |
| hsa-miR-27a                                                       | uucacaguggcuaaguuccgcc                      | Yes                                                                            |              |            |
| hsa-miR-27b                                                       | uucacaguggcuaaguucug                        | Yes                                                                            | Yes          | Yes        |
| hsa-miR-28                                                        | aaggagcucacagucuaauugag                     | Yes                                                                            | Yes          | Yes        |
| hsa-miR-29a                                                       | cuagcaccuugcuaaaucgguu                      | Yes                                                                            | Yes          | Yes        |
| hsa-miR-29b                                                       | uagcaccuuuugaaucagu                         | Yes                                                                            |              |            |
| hsa-miR-29c                                                       | uagcaccuuuugaaucgguaa                       | Yes                                                                            | Yes          | Yes        |
| hsa-miR-30a-3p                                                    | cuucagucggauguuugcagc                       | Yes                                                                            | Yes          | Yes        |
| hsa-miR-30b                                                       | uguaaacaucacuacacucagc                      | Yes                                                                            | Yes          | Yes        |
| hsa-miR-30c                                                       | uguaaacaucacuacacucagc                      | Yes                                                                            | Yes          | Yes        |
| hsa-miR-30d                                                       | uguaaacaucacacucagcagc                      | Yes                                                                            | Yes          | Yes        |
| hsa-miR-30e                                                       | uguaaacaucacuacacucagc                      | Yes                                                                            | Yes          | Yes        |
| hsa-miR-31                                                        | ggcaagaugcuggcauagcug                       | Yes                                                                            |              |            |
| hsa-miR-34a                                                       | uggcagugucuuagcugguugu                      | Yes                                                                            |              |            |
| hsa-miR-34b                                                       | aggcagugucuuagcugguugu                      | Yes                                                                            |              |            |
| hsa-miR-34c                                                       | aggcagugucuuagcugguugu                      | Yes                                                                            |              |            |
| hsa-miR-92                                                        | uauugcacuuguccggccugu                       | Yes                                                                            |              |            |
| hsa-miR-95                                                        | uucaacggguuuuuuugagca                       | Yes                                                                            |              |            |
| hsa-miR-96                                                        | uuuggcacuagcacuuuuugc                       | Yes                                                                            |              |            |
| hsa-miR-98                                                        | ugagguaguaaguuguauuguu                      | Yes                                                                            | Yes          | Yes        |
| hsa-miR-99a                                                       | aaccguagauccgaacuugug                       | Yes                                                                            |              | Yes        |
| hsa-miR-100                                                       | aaccguagauccgaacuugug                       | Yes                                                                            | Yes          | Yes        |
| hsa-miR-103                                                       | agcagcauuguacagggcuuga                      | Yes                                                                            | Yes          | Yes        |
| hsa-miR-104                                                       | ucaacaucagucugauaagcua                      | Yes                                                                            |              |            |

|                |                          |     |     |     |
|----------------|--------------------------|-----|-----|-----|
| hsa-miR-105    | ucaaaugcucagacuccugu     | Yes |     |     |
| hsa-miR-106a   | aaaagugcuuacagugcagguagc | Yes |     |     |
| hsa-miR-107    | agcagcauuguacaggcuauca   | Yes | Yes | Yes |
| hsa-miR-122a   | uggagugugacaauugguguuugu | Yes | Yes | Yes |
| hsa-miR-124a   | uuaaggcacgcggugaauccca   | Yes | Yes | Yes |
| hsa-miR-124b   | uuaaggcacgcggugaaugc     | Yes |     |     |
| hsa-miR-125a   | ucccugagaccuuuaaccugug   | Yes | Yes | Yes |
| hsa-miR-125b   | ucccugagaccuuaacuuguga   | Yes | Yes | Yes |
| hsa-miR-126    | ucguaccgugaguaauaaugc    | Yes | Yes | Yes |
| hsa-miR-127    | ucggauccgucugagcuuggcu   | Yes | Yes | Yes |
| hsa-miR-128a   | ucacagugaaccggucucuuuu   | Yes | Yes | Yes |
| hsa-miR-128b   | ucacagugaaccggucucuuuu   | Yes | Yes | Yes |
| hsa-miR-129    | cuuuuugcggucugggcuugc    | Yes |     |     |
| hsa-miR-130a   | cagugcaauguuaaaagggc     | Yes | Yes | Yes |
| hsa-miR-130b   | cagugcaaugaugaaaggc      | Yes | Yes | Yes |
| hsa-miR-132    | uaacagucuacagccauggucg   | Yes | Yes | Yes |
| hsa-miR-133a   | uuggucccuucaaccagcugu    | Yes | Yes | Yes |
| hsa-miR-133b   | uuggucccuucaaccagcua     | Yes | Yes |     |
| hsa-miR-134    | ugugacugguugaccagagg     | Yes | Yes | Yes |
| hsa-miR-135a   | uauggcuuuuuauuccuauuguga | Yes | Yes | Yes |
| hsa-miR-135b   | uauggcuuuucauuccuauugug  | Yes | Yes | Yes |
| hsa-miR-137    | uauugcuuaagaauacgcuag    | Yes | Yes | Yes |
| hsa-miR-138    | agcugguguugugaauuc       | Yes | Yes | Yes |
| hsa-miR-139    | ucuacagugcacgugucu       | Yes | Yes | Yes |
| hsa-miR-140    | agugguuuuaccuauugguag    | Yes | Yes | Yes |
| hsa-miR-141    | aacacugucugguaaagaugg    | Yes | Yes | Yes |
| hsa-miR-142-3p | uguaguguuuccuacuuuagga   | Yes |     | Yes |
| hsa-miR-142-5p | cauaaaguagaaagcacuac     | Yes | Yes | Yes |
| hsa-miR-144    | uacaguauagaugauguacuag   | Yes | Yes | Yes |
| hsa-miR-145    | guccaguuuucccaggaauccuu  | Yes | Yes | Yes |
| hsa-miR-146    | ugagaacugaauuccauggguu   | Yes | Yes | Yes |
| hsa-miR-147    | gugugggaaaugcuucugc      | Yes |     |     |
| hsa-miR-148a   | ucagugcacuacagaacuugu    | Yes | Yes |     |
| hsa-miR-149    | ucuggcuccgugucuucacucc   | Yes | Yes |     |
| hsa-miR-150    | ucucccaaccuuguaccagug    | Yes | Yes | Yes |
| hsa-miR-151    | acuagacugaagcuccuugagg   | Yes |     |     |
| hsa-miR-152    | ucagugcaugacagaacuugg    | Yes | Yes | Yes |
| hsa-miR-154    | uagguuaucguguugccuucg    | Yes | Yes | Yes |
| hsa-miR-154*   | aaucuaacacggugaccuauu    | Yes |     |     |
| hsa-miR-155    | uuaaugcuuaucgugaugggg    | Yes |     |     |
| hsa-miR-181a   | aacauucaacgcgucggugagu   | Yes | Yes | Yes |
| hsa-miR-181b   | aacauucauugcugucgguggguu | Yes | Yes | Yes |
| hsa-miR-181c   | aacauucaaccugucggugagu   | Yes | Yes | Yes |
| hsa-miR-182    | uuuggcaaugguagaacucaca   | Yes | Yes |     |
| hsa-miR-182*   | ugguucuagacuugccaacua    | Yes |     |     |
| hsa-miR-183    | uauggcacugguagaauucacug  | Yes | Yes | Yes |
| hsa-miR-184    | uggacggagaacuguaaagguu   | Yes | Yes | Yes |
| hsa-miR-185    | uggagagaaaggcaguuc       | Yes | Yes | Yes |
| hsa-miR-186    | caaagaaucuccuuuugggcuu   | Yes | Yes | Yes |
| hsa-miR-187    | ucgugucuuguguugcagccg    | Yes |     | Yes |
| hsa-miR-189    | gugccuacugagcugauaucagu  | Yes | Yes |     |

|                |                          |     |     |     |
|----------------|--------------------------|-----|-----|-----|
| hsa-miR-190    | ugauauguuugauauuuaggu    | Yes | Yes | Yes |
| hsa-miR-191    | caacggaaucccaaaagcagcu   | Yes | Yes | Yes |
| hsa-miR-193    | aacuggccuacaaaguccag     | Yes | Yes | Yes |
| hsa-miR-194    | uguaacagcaacuccaugugga   | Yes | Yes | Yes |
| hsa-miR-195    | uagcagcacagaaauuuggc     | Yes | Yes | Yes |
| hsa-miR-197    | uuccaccuccuuccaccaccagc  | Yes |     |     |
| hsa-miR-198    | gguccagaggggagauagg      | Yes |     |     |
| hsa-miR-199a   | cccaguguucagacuaccuguuc  | Yes | Yes | Yes |
| hsa-miR-199a*  | uacaguagucugcacauugguu   | Yes | Yes |     |
| hsa-miR-199b   | cccaguguuuagacuauucuguuc | Yes |     |     |
| hsa-miR-199-s  | cccaguguucagacuaccuguu   | Yes |     |     |
| hsa-miR-200a   | uaacacugucugguacgaugu    | Yes | Yes | Yes |
| hsa-miR-200b   | cucuaauacugccugguauaugau | Yes |     | Yes |
| hsa-miR-200c   | aaucacugccggguauaugugga  | Yes | Yes | Yes |
| hsa-miR-203    | gugaaauguuuaggaccacuag   | Yes |     | Yes |
| hsa-miR-204    | uuccuuugucauccuauugccu   | Yes |     | Yes |
| hsa-miR-205    | uccuucuuuccaccggagucug   | Yes | Yes | Yes |
| hsa-miR-210    | cugugcgugugacagcggcug    | Yes | Yes | Yes |
| hsa-miR-211    | uuccuuugucauccuucgccu    | Yes |     |     |
| hsa-miR-213    | accaucgaccguugauuguacc   | Yes | Yes | Yes |
| hsa-miR-214    | acagcaggcacagacaggcag    | Yes | Yes | Yes |
| hsa-miR-215    | augaccuauugaauugacagac   | Yes |     |     |
| hsa-miR-216    | uaaucucagcuggcaacugug    | Yes | Yes | Yes |
| hsa-miR-218    | uugugcuugaucuaaccaugu    | Yes | Yes | Yes |
| hsa-miR-219    | ugauuguccaaacgcaauucu    | Yes | Yes | Yes |
| hsa-miR-220    | ccacaccguaucugacacuuu    | Yes |     |     |
| hsa-miR-221    | agcuacauugucugcugguuuc   | Yes |     | Yes |
| hsa-miR-222    | agcuacaucuggcuacugggucuc | Yes | Yes | Yes |
| hsa-miR-223    | ugucaguuuugucaaaucccc    | Yes | Yes | Yes |
| hsa-miR-224    | caagucacuagugguuccguua   | Yes |     |     |
| hsa-miR-296    | agggccccccucaauccugu     | Yes | Yes | Yes |
| hsa-miR-299    | ugguuuaccguccacauacau    | Yes | Yes | Yes |
| hsa-miR-301    | cagugcauaguuuugucuaagc   | Yes | Yes |     |
| hsa-miR-302a   | uaagugcuuccauguuuugguga  | Yes | Yes |     |
| hsa-miR-302b   | uaagugcuuccauguuuaguag   | Yes |     |     |
| hsa-miR-302b*  | acuuuacauggaagugcuuucu   | Yes |     |     |
| hsa-miR-302c   | uaagugcuuccauguuucagugg  | Yes |     |     |
| hsa-miR-302c*  | uuuacauggggguaccugcug    | Yes |     |     |
| hsa-miR-302d   | uaagugcuuccauguuugagugu  | Yes |     |     |
| hsa-miR-320    | aaaagcuggguugagaggcgaa   | Yes | Yes | Yes |
| hsa-miR-323    | gcacauuacacggucgaccucu   | Yes | Yes | Yes |
| hsa-miR-324-5p | cgcaucccuagggaauuggugu   | Yes | Yes | Yes |
| hsa-miR-325    | ccuaguagguguccaguaagu    | Yes |     |     |
| hsa-miR-326    | ccucugggccuuccuccag      | Yes |     |     |
| hsa-miR-328    | cuggccucucugccuuccgu     | Yes | Yes | Yes |
| hsa-miR-330    | gcaaagcacacggccugcagaga  | Yes |     |     |
| hsa-miR-331    | gccccugggccuauuccuagaa   | Yes | Yes | Yes |
| hsa-miR-335    | ucaagagcaauaacgaaaaugu   | Yes | Yes | Yes |
| hsa-miR-337    | uccagcuccuauaugaugccuuu  | Yes |     |     |
| hsa-miR-338    | uccagcaucagugauuuuguuga  | Yes | Yes | Yes |
| hsa-miR-339    | uccuguccuccaggagcuca     | Yes | Yes | Yes |

|              |                           |                                     |     |     |
|--------------|---------------------------|-------------------------------------|-----|-----|
| hsa-miR-340  | uccgucucaguuacuuuauagcc   | Yes                                 | Yes | Yes |
| hsa-miR-342  | ucucacacagaaaucgcaccccguc | Yes                                 | Yes | Yes |
| hsa-miR-367  | aauugcacuuuagcaaugguga    | Yes                                 |     |     |
| hsa-miR-368  | acauagaggaaauuccacguuu    | Yes                                 |     |     |
| hsa-miR-370  | gccugcugggguggaaccugg     | Yes                                 |     |     |
| hsa-miR-371  | gugccgccaucuuuugagugu     | Yes                                 |     |     |
| hsa-miR-372  | aaagucugcgacauuugagcgu    | Yes                                 |     |     |
| hsa-miR-373  | gaagugcuucgauuuuggggugu   | Yes                                 |     |     |
| hsa-miR-373* | acucaaaugggggcgcuucc      | Yes                                 |     |     |
| hsa-miR-374  | uuauaaacaaccugauaagug     | Yes                                 |     |     |
| ath-miR159a  | uuuggauugaagggagcucua     | <i>Arabidopsis</i> negative control |     |     |
| cel-lin-4    | ucccugagaccucaaguguga     | <i>C. elegans</i> negative control  |     |     |
| cel-miR-2    | uaucaacagccagcuuugaugugc  | <i>C. elegans</i> negative control  |     |     |
